# Supplementary material for: Molecular Insight into the Possible Mechanism of Drag Reduction of Surfactant Aqueous Solution in Pipe Flow
Source: Int J Mol Sci. 2021 Jul 15;22(14):7573. doi: 10.3390/ijms22147573 (PMC8307477; doi:10.3390/ijms22147573)
Supplement: Supplementary file 1 [file ijms-22-07573-s001.zip › ijms-1271466-supplementary.pdf]

# Molecular Insight into the Possible Mechanism of Drag Reduction of Surfactant Aqueous Solution in Pipe Flow

Yusei Kobayashi,<sup>\*</sup> Hirotaka Gomyo, and Noriyoshi Arai

*Department of Mechanical Engineering, Keio University, 3-14-1 Hiyoshi, Kohoku-ku,  
Yokohama 223-8522, Japan*

E-mail: kobayashi@mech.keio.ac.jp

## Equilibrium morphologies

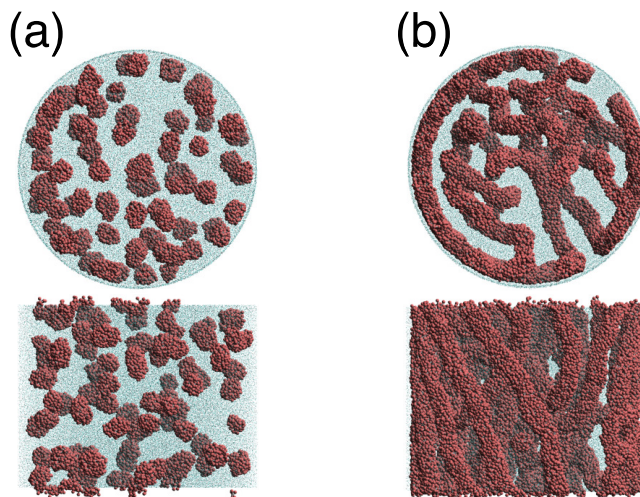

Figure S1: Snapshots of equilibrium morphologies of the surfactant aqueous solution confined in a hydrophilic tube for fractions (a)  $\phi = 0.01$  and (b)  $\phi = 0.03$ . For clarity, hydrophilic head particles are not shown.

## Estimation of flow properties

The frictional coefficient  $\lambda$  of a pipe is given by the Darcy-Weisbach formula

$$\lambda = \frac{2\Delta p D}{L\rho v_a^2} , \quad (1)$$

where  $\Delta p$  is the pressure loss,  $D$  is the tube diameter,  $L$  is the tube length,  $\rho$  is the density, and  $v_a$  is the mean velocity of the fluid. Here,  $v_a$  is defined as the volumetric flow rate,  $Q$ , divided by the cross-sectional area,  $A = \pi(D/2)^2$ .  $Q$  can be estimated by applying the cylindrical shell method to a velocity profile. We use a seventh-degree polynomial function to fit the curve of the velocity profile. The volumetric flow rate obtained by rotating about the axial ( $z$ ) direction of the tube is then

$$Q = \int_0^R 2\pi r |U_z(r)| dr , \quad (2)$$

where  $U_z(r)$  is the velocity profile and  $r$  is the radial distance from the center of the tube.

In this study, a generalized Reynolds number  $Re$  is used, as we focus on the onset point of the transition to turbulence. The generalized Reynolds number, which expresses the ratio of inertial forces to viscous forces, is defined as

$$Re = \frac{\rho v_a^{2-n} D^n}{K} , \quad (3)$$

where  $n$  is the power-law parameter and  $K$  is the flow-consistency index. In Figure S2, we plot the relation between the wall shear rate,  $\dot{\gamma}_{\text{wall}} = 4Q/(\pi R^3)$ , and the wall shear stress,  $\tau_{\text{wall}} = R\Delta p/(2L)$ ; we obtain  $n$  from the slope.  $K$  is defined as

$$K = \left\{ \frac{n\pi R^2}{(3n+1)Q} \right\}^n \left( \frac{R\Delta p}{2L} \right) . \quad (4)$$

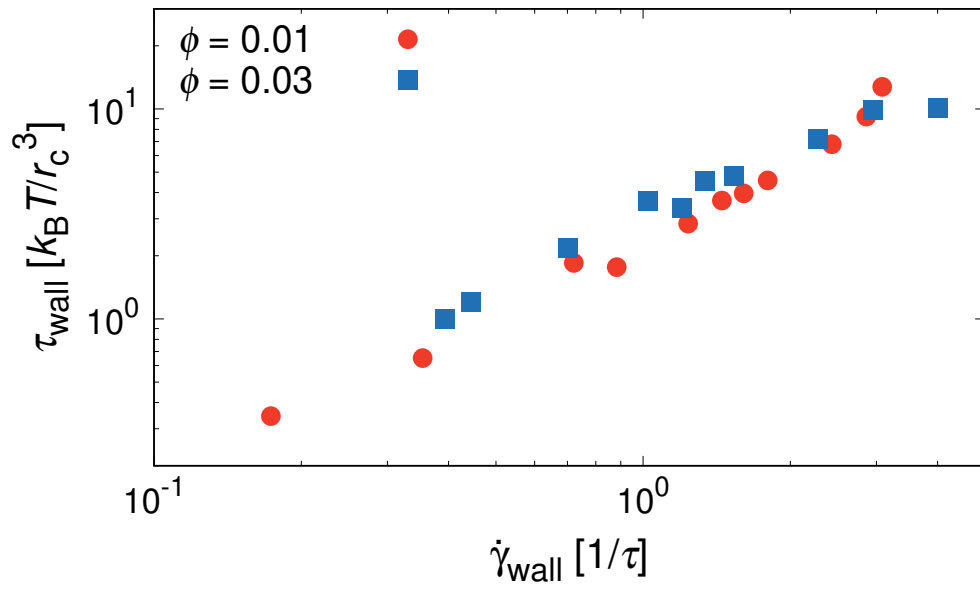

Figure S2: Wall shear rate  $\dot{\gamma}_{\text{wall}}$  *vs.* wall shear stress  $\tau_{\text{wall}}$  in the steady state, for different surfactant fractions  $\phi$ .
